## Assessing Plasticity in the Primary Sensory Cortex and Its Relation with Atypical

### Tactile Reactivity in Autism: A TMS-EEG Protocol

Shohreh Kariminezhad<sup>1</sup>, Reza Zomorodi<sup>3</sup>, Christoph Zrenner<sup>2,3</sup>, Daniel M. Blumberger<sup>2,3&5</sup>, Stephanie H.

Ameis<sup>1,2,3,4&5</sup>, Hsiang-Yuan Lin<sup>1,2</sup>, Meng-Chuan Lai<sup>1,2,4&5</sup>, Tarek K. Rajji<sup>2,3&5</sup>, Yona Lunskey<sup>1,2</sup>, Marcos

Sanches<sup>6</sup>, Pushpal Desarkar<sup>1,2,3&5\*</sup>

<sup>1</sup> Azrieli Adult Neurodevelopmental Centre, Centre for Addiction and Mental Health, Toronto, ON, Canada

<sup>2</sup> Department of Psychiatry, University of Toronto, Toronto, ON, Canada

<sup>3</sup> Temerty Centre for Therapeutic Brain Intervention, Centre for Addiction and Mental Health, Toronto, ON, Canada

<sup>4</sup> The Margaret and Wallace McCain Centre for Child, Youth & Family Mental Health, Centre for Addiction and Mental Health, Toronto, ON, Canada

<sup>5</sup> Campbell Family Mental Health Research Institute, Centre for Addiction and Mental Health, Toronto, ON, Canada

<sup>6</sup> Biostatistical Core, Centre for Addiction and Mental Health, Toronto, ON, Canada

\*Corresponding author

E-mail : [pushpal.desarkar@camh.ca](mailto:pushpal.desarkar@camh.ca) (PD)

---

# Abstract

## Background

Atypical sensory reactivity is a cardinal presentation in autism. Within the tactile domain, atypical tactile reactivity (TR) is common, it emerges early, persists into adulthood, and impedes social interaction and daily functioning. Hence, atypical TR is a key target for biological intervention to improve outcomes. Brain mechanisms informing biological interventions for atypical TR remains elusive. We previously reported hyper-plasticity in the motor cortex in autistic adults and found that repetitive transcranial magnetic stimulation (rTMS), designed to strengthen inhibitory processes in the brain, reduced hyper-plasticity. Whether the primary sensory cortex (S1) is characterized by hyper-plasticity, which may underlie atypical TR in autism is unknown.

## Objectives

We aim to test whether hyper-plasticity in the S1 underlies atypical TR in autism, and investigate if a single session of rTMS can safely reduce hyper-plasticity in S1 in autistic adults.

## Method

Plasticity will be assessed in the left S1 with integrated paired associative stimulation and electroencephalography (PAS-EEG) paradigm in 32 autistic adults and 32 age-, sex-, and intelligence quotient-matched controls. Autistic participants will be further randomized (double-blind, 1:1) to receive a single-session of either sham or active 20 Hz bilateral rTMS over the S1 and the plasticity will be re-assessed over the left S1 on the same day.

## Conclusions

Atypical TR has been identified as one of the top clinical research priorities that can influence outcome in autistic population. The study findings can be highly valuable to further elucidate the mechanism underlying atypical TR, which in turn can help with developing a mechanism-driven intervention.

**Keywords:** Autism spectrum disorder; Tactile reactivity; Primary sensory cortex; Plasticity; Transcranial magnetic stimulation-Electroencephalography

---

## Introduction

Autism Spectrum Disorder (hereafter will be called autism) is one of the most common neurodevelopmental conditions, affecting approximately 1% of the world population (1). It is estimated that over 90% of autistic individuals exhibit atypical sensory reactivity (2). Atypical sensory reactivity in the form of hyper- or hypo-reactivity to external stimuli is a cardinal presentation in autism. In the sensory domain, atypical tactile reactivity (TR) is a common presentation that emerges early, persists into adulthood, and adversely affects social interaction and daily functioning, thus significantly contributing to the overall disability (3,4). An international commission on the future of care and clinical research in autism identified the sensory domain as one of the top clinical research priorities that can influence care and outcome in autism (5). We engaged autistic adults attending our specialized autism clinic and received consistent feedback that this is a high-priority area of significant unmet need. Behaviorally, both tactile hypo- and hyper-reactivity are believed to be on the same continuum reflecting the same underlying biological process where hypo-reactivity is a coping mechanism to deal with excessive stimulation (6). Neurophysiologic studies of tactile processing (4,6) and neuroimaging studies of excitatory and inhibitory metabolites in the primary sensory cortex (S1) in autism remain inconsistent and inconclusive (7,8); therefore, brain processes informing biological interventions for atypical TR remains elusive.

Converging evidence indicates that the neurobiology of autism is characterized by atypical plasticity. A key insight from well-characterized valproic acid animal models of autism is that an excessive long-term potentiation (LTP) plasticity or hyper-plasticity adversely affects behavior (9-11). Hyper-plasticity was found in the S1 of mice that displayed atypical TR (11). Whether the S1 is characterized by hyper-plasticity, which may underlie atypical TR in autistic humans, is unknown.

A more direct evidence of hyper-plasticity was consistently observed in human motor cortex using transcranial magnetic stimulation (TMS) (12-15) with one exception (16). Our group replicated this finding of hyper-plasticity in the motor cortex in autistic adults (15). As a foundation for intervention, we also collected pilot data using a repetitive transcranial magnetic stimulation (rTMS) protocol designed to

strengthen inhibitory mechanisms, which reduced hyper-plasticity in autistic adults (15). In our previously published study (15), we conducted a randomized trial involving 29 autistic adults. The participants were allocated (1:1) to undergo either a single session of active or sham rTMS, with 6,000 pulses applied at 20Hz, targeting the motor cortex. In comparison to other widely-used inhibitory rTMS protocols, that are 1Hz and 10Hz, Dejesus et al. showed that 20Hz rTMS, when administered with 6,000 pulses, produced the maximum inhibitory effect (17). The results revealed a substantial effect size of active rTMS on Long-Term Potentiation (LTP), with LTP reduction observed on the day following rTMS. This decrease in hyper-plasticity aligns with the altered neuronal excitation/inhibition (E/I) model of autism (18). According to this model, the hyper-plasticity observed in autism is associated with an increased E/I ratio, and facilitating inhibition could contribute to the observed reduction. The rationale behind such approach has been previously published by our team (19).

Our primary goal is to test whether the S1 hyper-plasticity underlies atypical TR in autism. In this study, we will use the innovative combination of paired associative stimulation (PAS), a well-established TMS paradigm to study plasticity, and electroencephalography (EEG) or PAS-EEG, to assess plasticity (20). In PAS-EEG experiment, PAS induced LTP (i.e. PAS-LTP) is defined by potentiation of cortical evoked activity (CEA), which is measured by EEG. The reproducibility of the PAS-EEG method was reported in independent samples (21,22). We will also explore if a single session of ‘mechanism-driven’ rTMS (15) described above can reduce hyper-plasticity in the S1 and whether it is well-tolerated by autistic adults.

## Objectives

In this study, there are two primary objectives:

- (1) To assess and compare plasticity in the S1 between autistic adults and neurotypical controls.
- (2) To examine the relationship between TR and plasticity in the S1 within both study groups, i.e. autistic and neurotypical.

Additionally, we have two exploratory objectives:

(1) To investigate if a single-session of active bilateral rTMS delivered to the S1 can reduce the S1 hyper-plasticity in autistic adults.

(2) To assess tolerability of bilateral rTMS to the S1.

## Hypotheses

### Main hypotheses.

Our main hypotheses, pertaining to objectives 1 and 2, are as follows:

Hypothesis 1: Compared to neurotypical controls, autistic adults will display hyper-plasticity (i.e. significantly greater LTP) in the S1.

Hypothesis 2: There will be a positive association between plasticity and TR, however, the association will only be significant for the autistic group reflecting hyper-plasticity underlying excessive TR.

### Exploratory hypotheses.

Hypothesis 1: Autistic adults randomized to active bilateral rTMS will have less LTP in S1 following a single session of active rTMS than those randomized to single session of sham bilateral rTMS.

Hypothesis 2: Bilateral active rTMS to S1 will be well-tolerated.

## Method

### Design and Setting

The current study, comprising two phases (Fig 1), one of which is randomized and double-blind, will be conducted at CAMH's Temerty Centre for Therapeutic Brain Intervention, Toronto, Canada, from April 2023 to April 2025. The authors assert that all procedures contributing to this work comply with the ethical standards of the relevant national and institutional committees on human experimentation and with the

Helsinki Declaration of 1975, as revised in 2013. All procedures involving human subjects were reviewed and approved by the research ethics board at CAMH (135/2019).

All participants, both autistic and neurotypical, will undergo clinical assessments, which include diagnosis confirmation, handedness determination, IQ evaluation, and a TMS safety screen. Additionally, they will undergo a magnetic resonance imaging (MRI) scan of the brain, which will be used for MRI-guided neuronavigated TMS in subsequent sessions. On their next visit, all participants will complete the 92-item Sensory perception Quotient to assess TR (23). Then, plasticity will be assessed in the left S1 using PAS-EEG paradigm.

Upon completing the first phase, only autistic participants will be randomly assigned in a double-blind manner (1:1) to receive either a single-session of active or sham bilateral rTMS over the S1, followed by PAS-EEG plasticity assessment session, on the same day. Assignment will be determined using a permuted block randomization method generated by an independent biostatistician external to the project. The random allocation sequence will remain concealed throughout the experiment and data analysis, with only the investigators being unblinded upon finalization of the study.

The rTMS session will be scheduled with at least a one-week gap from the first plasticity assessment session to allow any potential carryover effects from the PAS to dissipate. This ensures that the subsequent rTMS treatment will not be influenced by the prior PAS intervention. The first participant was recruited on June 08, 2023. Fig 1 provides a schematic diagram illustrating the study design.

**Fig 1. Schematic diagram of the study design.** Initially, all participants ( $N = 64$ ) will undergo a baseline clinical assessment and MRI brain scan. In their third visit, the participants will complete the SPQ questionnaire and the plasticity in the left S1 will be assessed using PAS-EEG. Only autistic participants will be further randomly assigned to either the active or sham group, in a double-blind manner, to receive bilateral rTMS over the S1, and the plasticity of the left S1 will be reassessed on the same day following rTMS. This session will be scheduled at least one week after the third visit.

WASI-II, Wechsler Abbreviate Scale for intelligence - second edition; EHI, Edinberg Handedness Inventory; Edinberg Handedness Inventory (ARBQ-2); Social Responsiveness Scale-2 (SRS-2); Ritvo Autism Diagnostic Scale-Revised (RAADS-R); Autism Diagnostic Observation Schedule - second edition (ADOS-2); MRI: magnetic resonance imaging; SPQ: Sensory Perception Quotient; PAS: paired associative stimulation; EEG: electroencephalography; S1: primary sensory cortex; rTMS: repetitive transcranial magnetic stimulation.

## Participants

This study aims to enroll a total of 64 participants, comprising 32 adults diagnosed with autism as per fifth edition of the Diagnostic and Statistical Manual of Mental Disorders (DSM-5), without intellectual disability (24). This diagnosis will be confirmed through clinical assessment and the Autism Diagnostic Observation Schedule-2 (ADOS-2) (25).

It is important to note that our study will encompass autistic participants who have stable co-occurring mental health conditions and medications (41). Research findings indicate that 70% of young autistic individuals have at least one co-occurring mental health condition (26-28), and almost half of them meet criteria for more than one (27,28). We believe that excluding individuals with co-occurring mental health conditions and medication use is impractical and would hinder the generalizability of our findings. In addition, given the normative sex differences in plasticity (29), we will recruit at least 11 females, reflecting a higher male:female (2:1) ratio compared to previous ratio of 2.5-3:1 (30).

Autistic participants will primarily be recruited from Adult Neurodevelopmental Services outpatient clinics at CAMH, and CAMH research registry.

For the control group, an additional 32 neurotypical participants will be recruited through the healthy control registry, alongside advertising at local universities and in newspapers. The recruitment process will involve a 1:1 matching strategy, ensuring that for each autistic adult, a corresponding neurotypical counterpart will be sought based on age, sex, and IQ.

All prospective participants, expressing their willingness to take part in this study, will be referred to our research analyst for a detailed discussion about the study's objectives, protocols, potential risks, and their rights as research participants. Our research team will then assess the participant's eligibility for inclusion in the study, with the inclusion and exclusion criteria detailed in Table 1. Each participant will be required to provide a written consent at the outset of the study.

**Table 1.** Inclusion and exclusion criteria



## Inclusion

- I. Aged between 18 and 40 years
- II. Have IQ score > 80
- III. Capable of providing a written informal consent
- IV. Able to comprehend and communicate in English

## Exclusion

- I. Pregnancy
  - II. DSM-5 substance use within the past 6 months
  - III. Current or past history of acute and/or unstable physical disorders, e.g. hypertension
  - IV. Current or past history of neurobiological disorders, e.g. traumatic brain injury
  - V. Significant hearing and visual impairments
  - I. Claustrophobia
  - VII. Presence of comorbidities requiring urgent medical interventions
  - VIII. Presence of magnetic-sensitive implanted metals and devices in the body, e.g. cardiac pacemakers
  - IX. Use of benzodiazepines, anticonvulsants, dopaminergic antagonists, and cholinergic antagonists (autistic participants)
  - V. Presence of psychopathology rather than specific phobia, screened by Personality Assessment Inventory (neurotypical participants)
  - XI. Presence of diagnosed autism in any related biologically family members (neurotypical participants)
- 

## Measurement

### Baseline Clinical Assessment

At the outset of the study, we will perform a series of baseline assessments. All participants who meet the inclusion/exclusion criteria will be administered shortened second edition of the Wechsler Abbreviate Scale for intelligence (WASI-II), Edinberg Handedness Inventory (EHI), Adult Repetitive Behavior Questionnaire-2 (ARBQ-2), the Social Responsiveness Scale-2 (SRS-2), and SPQ (31-34, 23). To screen for the presence of general psychopathology in control adults, neurotypical participants will also complete

the Personality Assessment Inventory (PAI) (35). Furthermore, other than participating in ADOS-2, all autistic participants will complete the Ritvo Autism Diagnostic Scale-Revised (RAADS-R) (36).

## Phase I. Assessment of Plasticity

### Transcranial Magnetic Stimulation

TMS procedures will be performed using a Magstim 200 stimulator (Magstim Co., Whitland, UK) equipped with a 70-mm figure-of-eight coil. To enable neuronavigated TMS, structural T1-weighted magnetic resonance (MR) images will be obtained prior to the TMS session. These images will be acquired with a 3T MRI scanner (Discovery **MR750**, GE Healthcare, Chicago, IL, USA) for each participant at the Research Imaging Centre, CAMH. Subsequently, these MR images will be imported into BrainSight software (Rogue, Research Inc, Canada) for individual MRI-guided navigated TMS (nTMS).

The TMS stimulation session will begin with the identification of the cortical representation of the abductor pollicis brevis (APB) muscle, a process known as ‘hotspotting’. To locate the APB hotspot, we will position the intersection of the coil tangentially to the participants’ skull, optimizing it around the C3 electrode (the approximate location of the primary motor cortex for the hand). The coil’s handle will be oriented backward, forming a **45° angle** with the midline. Once the hotspot will be located, we will determine the resting motor threshold (RMT). The RMT will be identified as the lowest stimulus intensity required to induce MEPs with a peak-to-peak amplitude of at least 50 microvolts ( $\mu\text{V}$ ) in the relaxed right APB muscle, in at least half of 10 consecutive trials. Subsequently, 120% of RMT will be used to determine the stimulus intensity of 1 mV ( $SI_{1\text{mV}}$ ), i.e. the intensity of TMS needed to produce MEPs with mean peak-to-peak amplitude of 1 mV over 20 TMS trials. TMS stimulation will be then applied to the left S1 site (MNI coordinates: X = -48 mm, Y = -21 mm, Z = 50 mm), with the intensity set at  $SI_{1\text{mV}}$  throughout the session. In total, 100 single pulses will be delivered. This paradigm will be administered both before and after the PAS intervention at different time points (0, 15, 30, and 60 minutes) (Fig 2.A).

Participants will remain seated in a comfortable chair for the entire session, and to mask the auditory stimulation from TMS, white noise will be played through earplugs, with the volume adjusted at the limit of their comfort.

### **Electroencephalographic Recording and Preprocessing**

EEG recordings will be continuously acquired concurrently with TMS using a TMS-compatible 64-channel amplifier (Compumedic Inc) while the electrode impedances will be kept below 5 k $\Omega$ . The EEG recorded data will be referenced against the electrode positioned posterior to the vertex electrode (Cz). The sampling rate of 20 kHz and a low-pass filter of 100 Hz will be selected, to minimize the artifacts introduced by TMS and avoid amplifier saturation (37).

Thereafter, the acquired EEG data will be preprocessed offline using customized scripts in MATLAB (MathWorks Inc., Natick, MA, USA) and EEGLAB open source MATLAB toolbox, in accordance with a defined cleaning pipeline. According to this pipeline, the EEG data will be (1) trimmed from -2 ms to 10 ms after TMS pulse; (2) decay artifact will be removed with ICA and then data will be down-sampled to 1 kHz; (3) segmented into epochs (-1000 ms to 1000 ms with respect to the TMS pulses); (4) baseline-corrected using the artifact-free pre-TMS interval (from -500 ms to -5 ms); (5) another round of ICA will be applied to remove residual artifacts such as EOG and muscle artifacts. In the last step, data will be filtered using a zero-phase shift band-pass filter with a frequency range of 1 to 100 Hz and 60 re-referenced using an average reference for further analysis.

### **Paired Associative Stimulation Intervention**

To induce plasticity in the S1, a PAS paradigm will be adopted. During this PAS paradigm, one hundred eighty electrical stimuli will be delivered at 0.1 Hz over the right median nerve. The intensity of these stimuli will be set to three times the participant's perceptual threshold, which is the minimum intensity at which they can perceive the stimulation. To generate an LTP-like plasticity effect, the peripheral stimulation of the median nerve will be preceded the TMS stimulation of the contralateral S1 by 20 ms

(Fig 2.A). The 20 ms interval will be employed to ensure that the timing of the peripheral nerve stimulation and TMS is aligned with the arrival of the peripheral sensory input in the S1 (38). Participants will be instructed to maintain their attention on their stimulated wrist and count the number of pulses they will receive throughout the protocol. This instruction is based on the recognition that attention can modulate the effects of PAS, as suggested by the study conducted by Stefan et al (39).

## **Phase II. Repetitive Transcranial magnetic Stimulation Procedure in Autistic**

### **Participants**

Stimulation will be conducted with an X100 stimulator with a double-sided B65 A/P type fluid-cooled coil (MagVenture, Farum, Denmark Inc.) which is a combined active/sham coil with identical sides. Single-session 20 Hz rTMS will be delivered bilaterally over the S1 at 90% of RMT, with 120 trains of 50 pulses and an inter-train interval (ITI) of 30 s (Fig 2.B). In total, 6000 pulses will be administered to each autistic participant. The sequence of delivery will be randomized for each participant, i.e., left S1 followed by the right S1 or vice versa. Sham stimulation will be delivered using the sham side of the coil, which does not generate a magnetic field but mimics the sensation of magnetic stimulation and produces the same clicking sounds.

**Fig 2. Schematic figure of plasticity assessment and intervention phases of the current study (A).** The plasticity assessment procedure consists of delivering 100 single TMS pulses over the left S1 using S11 mV which will be applied before and after (0, 15, 30, and 60 min) PAS intervention. Throughout the PAS intervention, electrical stimulation of the right median nerve will precede TMS stimulation of the left S1 at an ISI of 20 ms. The plasticity will be then assessed using the ratio of the maximum CEA following PAS to the baseline CEA. CEA is quantified as the area under the curve of rectified TMS-EEG response within a time window of 25-275 ms from TMS stimulus onset. **(B).** Autistic participants will be further randomized to receive either a single session sham or active 20 Hz rTMS. The rTMS intervention will be delivered bilaterally over the S1 consisting of 120 trains of 50 pulses with an ITI of 30s (in total, 6000 pulses). The sequence of delivery will be randomized for each participant, that is left S1 followed by right S1 and vice versa, and the pulses will be applied at an intensity of 90% RMT. Following rTMS, on the same day, TMS-EEG plasticity assessment paradigm will be applied.

## Outcomes

### Primary Outcome

The primary outcome measure of this study is the PAS-induced LTP in the S1. PAS-induced LTP will be assessed using CEA. CEA is quantified as the area under the curve of rectified TMS-EEG response within a time window of 25-275 ms from TMS stimulus onset (40). This chosen time window is designed to exclude any early artifacts and account for the subsiding effects of TMS. CEA will be averaged across 100 epochs from the electrodes of interest corresponding to the S1 region. The mean post-PAS CEA will be then divided by the pre-PAS CEA, reflecting the potentiation of CEA at each of post-PAS time points (0, 15, 30, and 60 minutes). Given that the timing of the post-PAS maximum potentiation could differ among participants, we will use the maximum CEA ratio for each participant for the statistical analysis (20).

To assess TR, the total score on the “touch” category of SPQ questionnaire will be used.

### *A Priori* Power Calculation

A sample size of  $N = 64$  participants, consisting of 32 autistic participants and 32 neurotypical controls, has been determined as adequate for hypothesis testing. This sample size provides 90% power. This calculation is based on the preliminary data, the observed LTP difference of 20.6 points, as evidenced in our PAS-EEG pilot study involving both autistic adults and control subjects. Moreover, the same sample size is deemed suitable for evaluating hypotheses 2, offering an 80% statistical power to detect a moderate effect size (Cohen’s  $f^2 = 0.15$ ). These power calculations were executed using G\*Power.

Drawing upon our previously published findings (15), we envision a "substantial" impact of active rTMS in a group of 16 autistic participants when compared to a sham group also consisting of 16 autistic participants. It is important to note that, given the relatively small sample size, the application of a single session, and the exploratory nature of this outcome, our approach to presenting results and their interpretation will extend beyond statistical significance values. Instead, we will place significant emphasis

on estimated effects and their precision, including the calculation of 95% confidence intervals. This comprehensive set of information, combined with data related to tolerability, will play a pivotal role in shaping the design of future clinical trials.

## Statistical Analysis

Hypothesis 1: To test this hypothesis, we will employ a linear regression model with CEA ratio (LTP) as dependent variable and study groups (autistic and neurotypical controls) as independent variable. Age, sex, hemisphere of PAS-EEG assessment, IQ and pre-PAS CEA (an index of individual baseline cortical excitability) will enter the model as ‘control’ independent variables. To ensure robustness, a model diagnostic will be conducted through analysis of residuals and Cook’s distance. Potential confounding effect of medication use among autistic adults on plasticity will be investigated in a post-hoc sensitivity analysis.

Hypothesis 2: We will use a multivariate analysis of variance to test this hypothesis where TR will be dependent outcome; S1 plasticity, study groups and their interaction will be the main predictors; and sex, age, hemisphere of PAS-EEG assessment and IQ will enter the model as controls. If the interaction between S1 plasticity and study group proves to be significant at confidence level 0.05, a further investigation of the nature of the association will be conducted separately within each group, by means of linear contrasts.

Exploratory Hypotheses: In order to study the effect of active vs. sham rTMS on LTP, we will use an analysis of covariance with CEA ratio (LTP) as dependent variable, groups (active and sham rTMS) as fixed factor, and pre-rTMS CEA ratio as covariate. We will count discontinuation of rTMS session and adverse events to assess tolerability.

## Discussion

Our study will be the first to assess plasticity in the S1 in autistic adults using the innovative PAS-EEG. Completion of our study objectives will fill in a critical void in our understanding, i.e., if successful, we will

identify the S1 hyper-plasticity as one brain mechanism underlying atypical TR and associated behavioral characteristics of autism. This information will provide us a biological target for testing ‘mechanism-driven’ interventions for tactile sensory difficulties in autism. Further, S1 hyper-plasticity may serve as a potential biomarker for TR and core behavioral characteristics in autism.

In conclusion, this protocol describes the study rationale, objectives, hypotheses, design and proposed methodologies of identifying the S1 plasticity in autistic adults. This study may provide a new line of translational inquiry that has not been explored in autism before.

## **Authors’ Contributions**

S.K. participates in data acquisition, analyzing and interpreting the data, and wrote the first draft of the manuscript. P.D. is involved in study design and administration, data analysis and interpretation, and critically revised the manuscript. R.Z. is involved in study design, data analysis and interpretation, and provided critical revisions to the manuscript. M.S. is involved in data analysis. C.Z., DM.B., SH.A., HY.L., MC.L., TK. R., and Y.L., all contribute to data interpretation and critically reviewed the manuscript. The final manuscript was approved by all authors.

## **Acknowledgment**

This work is supported by the Innovation Fund from the Alternate Funding Plan of the Academic Health Sciences Centres of Ontario, CAMH Discovery Fund, CAMH Discovery Fund Postdoctoral Fellowship Award (SK), and the Academic Scholar Award from the Department of Psychiatry, University of Toronto. We extend our gratitude to the study participants for their contributions to this research. Additionally, we would like to thank Ashna Imran, and Sushmit Das, research analysts, for their assistance in data acquisition and management.

---

## References

1. Zeidan J, Fombonne E, Scora J, Ibrahim A, Durkin MS, Saxena S, Yusuf A, Shih A, Elsabbagh M. Global prevalence of autism: A systematic review update. *Autism Res.* 2022; 15(5):778–90. doi:10.1002/aur.2696
2. Marco EJ, Hinkley LB, Hill SS, Nagarajan SS. Sensory processing in autism: A review of neurophysiologic findings. *Pediatr Res.* 2011; 69(5 Pt 2):48R–54R. doi:10.1203/PDR.0b013e3182130c54
3. Sinclair D, Oranje B, Razak KA, Siegel SJ, Schmid S. Sensory processing in autism spectrum disorders and Fragile X syndrome-From the clinic to animal models. *Neurosci Biobehav Rev.* 2017; 76(Pt B):235–53. doi:10.1016/j.neubiorev.2016.05.029
4. Balasco L, Provenzano G, Bozzi Y. Sensory abnormalities in autism spectrum disorders: A focus on the tactile domain, from genetic mouse models to the clinic. *Front Psychiatry.* 2020; 10:1016. doi:10.3389/fpsy.2019.01016
5. Lord C, Charman T, Havdahl A, Carbone P, Anagnostou E, Boyd B, Carr T, de Vries PJ, Dissanayake C, Divan G, Freitag CM, Gotelli MM, Kasari C, Knapp M, Mundy P, Plank A, Scahill L, Servili C, Shattuck P, Simonoff E, et al. The Lancet Commission on the future of care and clinical research in autism. *Lancet.* 2022; 399(10321):271–334. doi:10.1016/S0140-6736(21)01541-5
6. Mikkelsen M, Wodka EL, Mostofsky SH, Puts NAJ. Autism spectrum disorder in the scope of tactile processing. *Dev Cogn Neurosci.* 2018; 29:140–50. doi:10.1016/j.dcn.2016.12.005
7. Sapey-Triomphe LA, Lamberton F, Sonié S, Mattout J, Schmitz C. Tactile hypersensitivity and GABA concentration in the sensorimotor cortex of adults with autism. *Autism Res.* 2019; 12(4):562-575. doi:10.1002/aur.2073
8. Kolodny T, Schallmo MP, Gerdtts J, Edden RAE, Bernier RA, Murray SO. Concentrations of cortical GABA and glutamate in young adults with autism spectrum disorder. *Autism Res.* 2020; 13(7):1111–29. doi:10.1002/aur.2300



9. Markram K, Markram H. The intense world theory - a unifying theory of the neurobiology of autism. *Front Hum Neurosci.* 2010; 4:224. doi:10.3389/fnhum.2010.00224
10. Pascual-Leone A, Freitas C, Oberman L, Horvath JC, Halko M, Eldaief M, Bashir S, Vernet M, Shafi M, Westover B, Vahabzadeh-Hagh AM, Rotenberg A. Characterizing brain cortical plasticity and network dynamics across the age-span in health and disease with TMS-EEG and TMS-fMRI. *Brain Topogr.* 2011; 24(3-4):302–15. doi:10.1007/s10548-011-0196-8
11. Rinaldi T, Kulangara K, Antonello K, Markram H. Elevated NMDA receptor levels and enhanced postsynaptic long-term potentiation induced by prenatal exposure to valproic acid. *Proc Natl Acad Sci U S A.* 2007; 104(33):13501–6. doi:10.1073/pnas.0704391104
12. Oberman L, Ifert-Miller F, Najib U, Bashir S, Woollacott I, Gonzalez-Heydrich J, Picker J, Rotenberg A, Pascual-Leone A. Transcranial magnetic stimulation provides means to assess cortical plasticity and excitability in humans with fragile X syndrome and autism spectrum disorder. *Front Synaptic Neurosci.* 2010; 2:26. doi:10.3389/fnsyn.2010.00026
13. Oberman L, Eldaief M, Fecteau S, Ifert-Miller F, Tormos JM, Pascual-Leone A. Abnormal modulation of corticospinal excitability in adults with Asperger's syndrome. *Eur J Neurosci.* 2012; 36(6):2782–8. doi:10.1111/j.1460-9568.2012.08172.x
14. Oberman LM, Ifert-Miller F, Najib U, Bashir S, Heydrich JG, Picker J, Rotenberg A, Pascual-Leone A. Abnormal mechanisms of plasticity and metaplasticity in autism spectrum disorders and fragile X syndrome. *J Child Adolesc Psychopharmacol.* 2016; 26(7):617–24. doi:10.1089/cap.2015.0166
15. Desarkar P, Rajji TK, Ameis SH, Blumberger DM, Lai MC, Lunskey Y, Daskalakis ZJ. Assessing and stabilizing atypical plasticity in autism spectrum disorder using rTMS: Results from a proof-of-principle study. *Clin Neurophysiol.* 2022; 141:109–18. doi:10.1016/j.clinph.2021.03.046
16. Jung NH, Janzarik WG, Delvendahl I, Münchau A, Biscaldi M, Mainberger F, Bäumer T, Rauh R, Mall V. Impaired induction of long-term potentiation-like plasticity in patients with high-functioning autism and Asperger syndrome. *Dev Med Child Neurol.* 2013; 55. doi:10.1111/dmcn.12012

17. de Jesus DR, Favalli GPS, Hoppenbrouwers SS, Barr MS, Chen R, Fitzgerald PB, Daskalakis ZJ.  
Determining optimal rTMS parameters through changes in cortical inhibition. *Clin Neurophysiol.* 2014; 125(4):755–62. doi:10.1016/j.clinph.2013.09.011
18. Rubenstein JL, Merzenich MM. Model of autism: increased ratio of excitation/inhibition in key neural systems. *Genes Brain Behav.* 2003; 2(5):255–67. doi:10.1034/j.1601-183x.2003.00037.x
19. Desarkar P, Rajji TK, Ameis SH, Daskalakis ZJ. Assessing and stabilizing aberrant neuroplasticity in autism spectrum disorder: The potential role of transcranial magnetic stimulation. *Front Psychiatry.* 2015;6:124. doi:10.3389/fpsy.2015.00124
20. Rajji TK, Sun Y, Zomorodi-Moghaddam R, Farzan F, Blumberger DM, Mulsant BH, Fitzgerald PB, Daskalakis ZJ. PAS-induced potentiation of cortical-evoked activity in the dorsolateral prefrontal cortex. *Neuropsychopharmacology.* 2013; 38(12):2545–52. doi:10.1038/npp.2013.161
21. Kumar S, Zomorodi R, Ghazala Z, Goodman MS, Blumberger DM, Cheam A, Fischer C, Daskalakis ZJ, Mulsant BH, Pollock BG, Rajji TK. Extent of dorsolateral prefrontal cortex plasticity and its association with working memory in patients with Alzheimer disease. *JAMA Psychiatry.* 2017; 74(12):1266–74. doi:10.1001/jamapsychiatry.2017.3292
22. Loheswaran G, Barr MS, Zomorodi R, Rajji TK, Blumberger DM, Foll BL, Daskalakis ZJ.  
Impairment of neuroplasticity in the dorsolateral prefrontal cortex by alcohol. *Sci Rep.* 2017; 7(1):5276. doi:10.1038/s41598-017-04764-9
23. Tavassoli T, Hoekstra RA, Baron-Cohen S. The Sensory Perception Quotient (SPQ): development and validation of a new sensory questionnaire for adults with and without autism. *Mol Autism.* 2014; 5:29. doi:10.1186/2040-2392-5-29
24. American Psychiatric Association, DSM-5 Task Force. Diagnostic and statistical manual of mental disorders: DSM-5™. 5th ed. American Psychiatric Publishing, Inc.; 2013.  
doi:10.1176/appi.books.9780890425596
25. Lord C, Rutter M, Goode S, Heemsbergen J, Jordan H, Mawhood L, Schopler E. Autism diagnostic observation schedule: a standardized observation of communicative and social behavior. *J Autism Dev Disord.* 1989; 19(2):185–212. doi:10.1007/BF02211841

26. Abdallah MW, Greaves-Lord K, Grove J, Nørgaard-Pedersen B, Hougaard DM, Mortensen EL. Psychiatric comorbidities in autism spectrum disorders: findings from a Danish Historic Birth Cohort. *Eur Child Adolesc Psychiatry*. 2011; 20(11-12):599–601. doi:10.1007/s00787-011-0220-2
27. Leyfer OT, Folstein SE, Bacalman S, Davis NO, Dinh E, Morgan J, Tager-Flusberg H, Lainhart JE. Comorbid psychiatric disorders in children with autism: interview development and rates of disorders. *J Autism Dev Disord*. 2006; 36(7):849–861. doi:10.1007/s10803-006-0123-0
28. Simonoff E, Pickles A, Charman T, Chandler S, Loucas T, Baird G. Psychiatric disorders in children with autism spectrum disorders: prevalence, comorbidity, and associated factors in a population-derived sample. *J Am Acad Child Adolesc Psychiatry*. 2008; 47(8):921–929. doi:10.1097/CHI.0b013e318179964f
29. Mottron L, Duret P, Mueller S, Moore RD, Forgeot d'Arc B, Jacquemont S, Xiong L. Sex differences in brain plasticity: a new hypothesis for sex ratio bias in autism. *Mol Autism*. 2015; 6:33. doi:10.1186/s13229-015-0024-1
30. Posserud MB, Skretting Solberg B, Engeland A, Haavik J, Klungsøyr K. Male to female ratios in autism spectrum disorders by age, intellectual disability and attention-deficit/hyperactivity disorder. *Acta Psychiatr Scand*. 2021; 144(6):635–646. doi:10.1111/acps.13368
31. Wechsler, D. (2011). Wechsler Abbreviated Scale of Intelligence--Second Edition (WASI-II) [Database record]. APA PsycTests. <https://psycnet.apa.org/doi/10.1037/t15171-000>
32. Oldfield R. C. (1971). The assessment and analysis of handedness: the Edinburgh inventory. *Neuropsychologia*, 9(1), 97–113. [https://doi.org/10.1016/0028-3932\(71\)90067-4](https://doi.org/10.1016/0028-3932(71)90067-4)
33. Barrett, S. L., Uljarević, M., Baker, E. K., Richdale, A. L., Jones, C. R., & Leekam, S. R. (2015). The Adult Repetitive Behaviours Questionnaire-2 (RBQ-2A): A Self-Report Measure of Restricted and Repetitive Behaviours. *Journal of autism and developmental disorders*, 45(11), 3680–3692. <https://doi.org/10.1007/s10803-015-2514-6>
34. Frazier, T. W., Ratliff, K. R., Gruber, C., Zhang, Y., Law, P. A., & Constantino, J. N. (2014). Confirmatory factor analytic structure and measurement invariance of quantitative autistic traits

measured by the Social Responsiveness Scale-2. *Autism*, 18(1), 31–44.

<https://doi.org/10.1177/1362361313500382>

35. Morey, L. C., & Ambwani, S. (2008). The Personality Assessment Inventory. In G. J. Boyle, G. Matthews, & D. H. Saklofske (Eds.), *The SAGE handbook of personality theory and assessment*, Vol. 2. Personality measurement and testing (pp. 626–645). Sage Publications, Inc.  
<https://doi.org/10.4135/9781849200479.n30>
36. Ritvo, R. A., Ritvo, E. R., Guthrie, D., Ritvo, M. J., Hufnagel, D. H., McMahon, W., Tonge, B., Mataix-Cols, D., Jassi, A., Attwood, T., & Eloff, J. (2011). The Ritvo Autism Asperger Diagnostic Scale-Revised (RAADS-R): a scale to assist the diagnosis of Autism Spectrum Disorder in adults: an international validation study. *Journal of autism and developmental disorders*, 41(8), 1076–1089. <https://doi.org/10.1007/s10803-010-1133-5>
37. Daskalakis, Z. J., Farzan, F., Barr, M. S., Maller, J. J., Chen, R., & Fitzgerald, P. B. (2008). Long-interval cortical inhibition from the dorsolateral prefrontal cortex: a TMS-EEG study. *Neuropsychopharmacology : official publication of the American College of Neuropsychopharmacology*, 33(12), 2860–2869. <https://doi.org/10.1038/npp.2008.22>
38. Stefan, K., Kunesch, E., Cohen, L. G., Benecke, R., & Classen, J. (2000). Induction of plasticity in the human motor cortex by paired associative stimulation. *Brain*, 123(3), 572–584.  
<https://doi.org/10.1093/brain/123.3.572>
39. Stefan, K., Wycislo, M., & Classen, J. (2004). Modulation of associative human motor cortical plasticity by attention. *Journal of neurophysiology*, 92(1), 66–72.  
<https://doi.org/10.1152/jn.00383.2003>
40. Hill, A. T., Rogasch, N. C., Fitzgerald, P. B., & Hoy, K. E. (2016). TMS-EEG: A window into the neurophysiological effects of transcranial electrical stimulation in non-motor brain regions. *Neuroscience and biobehavioral reviews*, 64, 175–184.  
<https://doi.org/10.1016/j.neubiorev.2016.03.006>

41. Lai MC, Kassee C, Besney R, Bonato S, Hull L, Mandy W, Szatmari P, Ameis SH. Prevalence of co-occurring mental health diagnoses in the autism population: a systematic review and meta-analysis. *Lancet Psychiatry*. 2019; 6(10):819–829. doi:10.1016/S2215-0366(19)30289-5

medRxiv preprint doi: <https://doi.org/10.1101/2024.05.24.24307857>; this version posted May 27, 2024. The copyright holder for this preprint (which was not certified by peer review) is the author/funder, who has granted medRxiv a license to display the preprint in perpetuity. It is made available under a [CC-BY 4.0 International license](#).

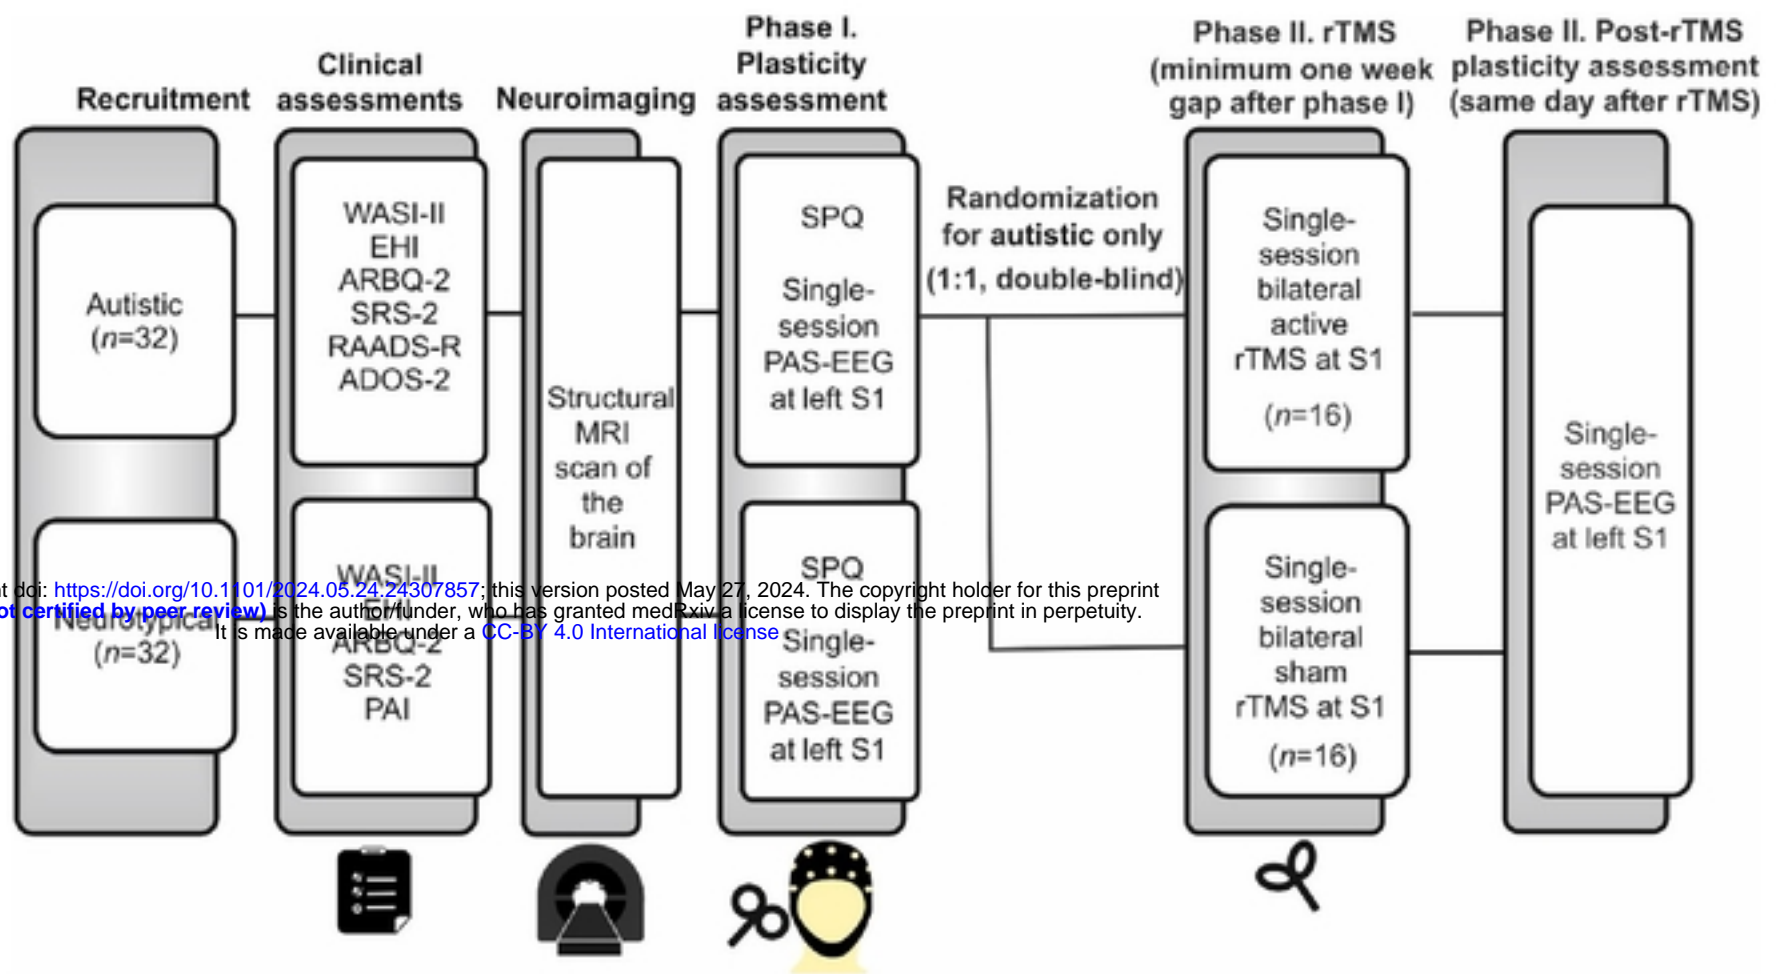

Fig 1.

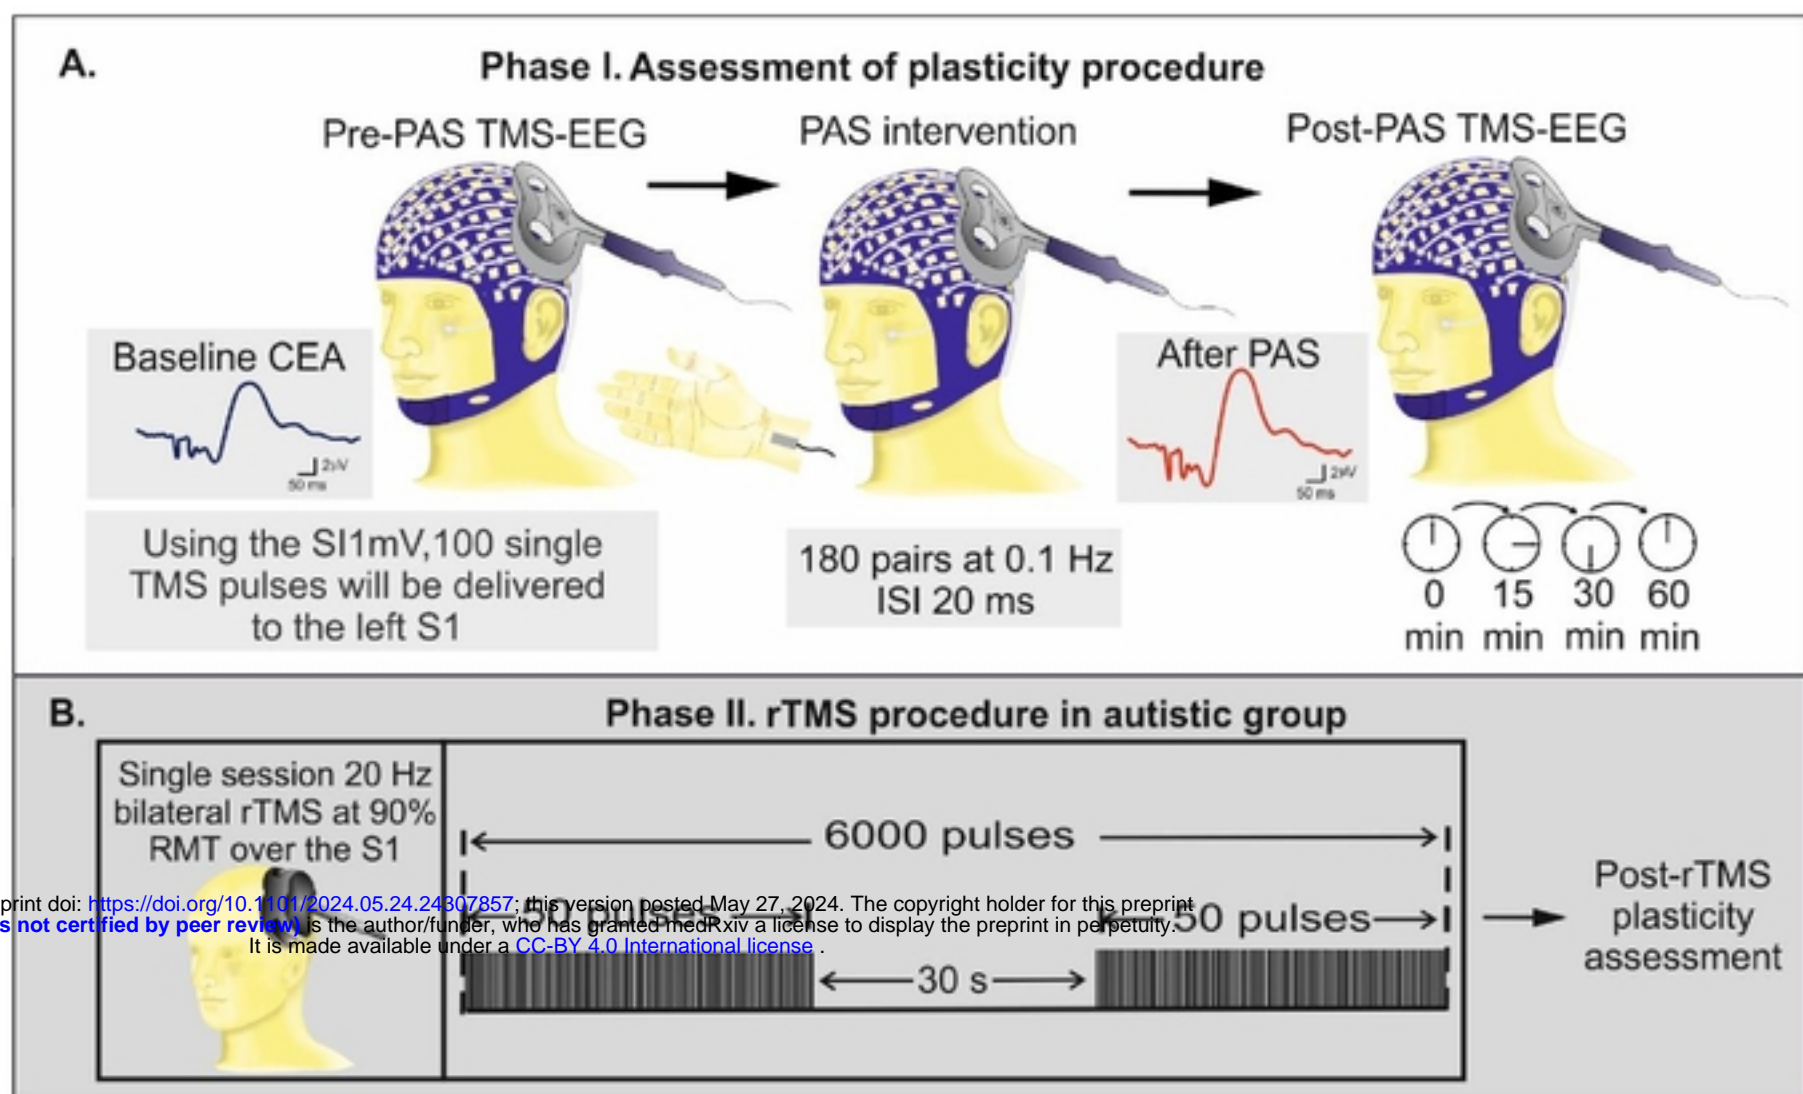

Fig 2.
